# Supplementary material
Source: PubMed Central journal article supplement (PMC2871419)
Supplement: supp_M900485-MCP200_Legends.pdf [file supp_M900485-MCP200_Legends.pdf]

## **Legends for Supplementary Material**

**Supplementary Table S1.** List of proteins identified in the immunisolates of EGFP-tagged UL99. The detection and confirmation of the co-isolated proteins is indicated, together with information regarding the gi protein number, sequence coverage, number of peptides observed, scores (d' values from the database search using the XProteo software) obtained following the analysis of the MS data and confirmed peptides sequences following MS/MS analyses.

**Supplementary Table S2.** List of proteins identified in the immunisolates of EGFP-tagged UL32. The detection and confirmation of the co-isolated proteins is indicated, together with information regarding the gi protein number, sequence coverage, number of peptides observed, scores (d' values from the database search using the XProteo software) obtained following the analysis of the MS data and confirmed peptides sequences following MS/MS analyses. We categorized several proteins as likely contaminants, as these corresponded to proteins that we routinely encounter in isolates from mammalian cells.
