# Supplementary material
Source: PubMed Central journal article supplement (PMC2871419)
Supplement: supp_M900485-MCP200_SupplTableS1.pdf [file supp_M900485-MCP200_SupplTableS1.pdf]

| Tagged Protein UL99                     |       |                                                  |          |        |                    | MS results            |                    | MS/MS confirmation                                                                    |
|-----------------------------------------|-------|--------------------------------------------------|----------|--------|--------------------|-----------------------|--------------------|---------------------------------------------------------------------------------------|
| Isolated proteins                       |       |                                                  | gi #     | kDa    | # peptides from MS | Sequence coverage (%) | Xproteo score (d') | peptide sequences                                                                     |
| <b>Tag</b>                              | GFP   | green fluorescent protein                        | 26892271 | 26.89  | 5                  | 28                    | 47.6               | FSVSGEGGDATYGK<br>SAMPEGYVQER<br>LEYNYNSHNVYIMADK<br>TIFFKDDGNYK<br>GIDFKEDGNILGHK    |
| <b>Viral (HCMV) Human herpesvirus 5</b> | UL99  | UL99                                             | 52139271 | 20.92  | 5                  | 15.7                  | 4                  | ISQRPPTPGTK<br>LPRPDTPR<br>RLPRDTPR<br>KISQRPPTPGTK                                   |
|                                         | UL86  | major capsid protein                             | 9625772  | 153.87 | 16                 | 11.8                  | 1.3                | LRPPDYEETLR<br>TLIEYSLPVFHR<br>IVIGNLPDGLAPGPFHELRLR                                  |
|                                         | UL45  | UL45                                             | 44903271 | 101.61 | 13                 | 10.1                  | -                  | VPQYDFLISADPFSLR<br>ELVTEAVVWGNAR                                                     |
|                                         | UL119 | UL119                                            | 28373219 | 38.71  | 9                  | 23.1                  | 2.8                | RLEEPVEEK<br>GPFTQVGYLSAFPDPNEGK<br>KHPVPYFK<br>SFSTTYVFIK                            |
|                                         | UL83  | 65 kDa phosphoprotein                            | 130715   | 61.64  | 16                 | 38.4                  | 14.5               | GPQYSEHPTFTSQYR<br>EPDVVYTSAFVFPFK<br>GDTPVLPHETR<br>IFAELEGVWQPAAPK<br>YQEFFWDANDIYR |
|                                         | UL44  | UL44                                             | 52139229 | 46.26  | 7                  | 24                    |                    | FILTNGSELEFTANNR<br>IVTEHDTLLYASR<br>FYVQDISDLSAK<br>LSEPPTLALR                       |
|                                         | UL94  | UL94                                             | 9625780  | 38.38  | 6                  | 19.4                  | 15.1               | TAAQVTLGDGLDYHIGVK<br>TDVWDLVK<br>TDVWDLVKVEEPVSR<br>YQGHYGVNHVHR                     |
|                                         | RL11  | RL11                                             | 34422121 | 26.66  | 13                 | 44.7                  | 17.7               | VVVTDSQEADR<br>IGEQDAEHLR<br>DTGVYLLQDQYTGDFEAFYLIHPR                                 |
|                                         | RL12  | RL12                                             | 39841659 | 47.37  | 15                 | 27                    | 7.2                | NAHTQSWYWLR<br>KYHMLQDTVSESEFIVR<br>QTVYTIIVFCMLHK                                    |
| <b>Host (Homo sapiens)</b>              | UBQ   | Ubiquitin                                        | 66361226 | 11.04  | 5                  | 50.5                  | 10.1               | IQDKGIPPDQQR<br>TITLVEPSDTIENVK<br>ESTLHLVLR                                          |
|                                         | MYH11 | smooth muscle myosin heavy chain 11 isoform SM2A | 13124875 | 223.58 | 27                 | 11.8                  | 6.3                | KQELEEILHEMEAR<br>NFINSPVAQADWAAKR                                                    |
| <b>Likely contaminants</b>              | SSA1  | 52kD Ro/SSA autoantigen                          | 15208660 | 54.17  | 10                 | 15.5                  | 5                  | IHAEFVQQK<br>NFLVEEEQR                                                                |
|                                         | ACTB  | actin beta                                       | 14250401 | 41.01  | 8                  | 28.7                  | 4.6                | VAPEEHPVLLTEAPLNPK<br>SYELPDGQVITIGNER                                                |
