# Supplementary material
Source: PubMed Central journal article supplement (PMC2871419)
Supplement: supp_M900485-MCP200_SupplTableS2.pdf [file supp_M900485-MCP200_SupplTableS2.pdf]

| Tagged Protein UL32                 |       |                                            |          |        | MS results        |                       |                                               | MS/MS confirmation                                                                                                                                                   |
|-------------------------------------|-------|--------------------------------------------|----------|--------|-------------------|-----------------------|-----------------------------------------------|----------------------------------------------------------------------------------------------------------------------------------------------------------------------|
| Isolated proteins                   |       |                                            | gi #     | kDa    | #peptides from MS | Sequence coverage (%) | Xproteo score MS                              | peptide sequences                                                                                                                                                    |
| Tag                                 | GFP   | green fluorescent protein                  | 6118373  | 26.86  | 11                | 41                    | 2.2                                           | SAMPEGYVQER<br>TIFFKDDGNYK                                                                                                                                           |
| Viral (HCMV)<br>Human herpesvirus 5 | UL32  | UL32, tegument protein pp150               | 52139218 | 112.69 | 39                | 42.6                  | 45.3                                          | FHNPDLSVLEEFVR<br>FEAHGSLAPAEHAAR<br>HAAFLSVSPQVTK<br>GYTYPFGDR<br>DVVALVNFLR<br>NPHLAYNPFK<br>RDVVALVNFLR<br>TPSDAVQNILQK<br>AVVGRPPSPVVGSGAPGR<br>VDDEVVQREK       |
|                                     | UL86  | UL86, major capsid protein                 | 9625772  | 153.87 | 80                | 80.3                  | 87.3                                          | ELFLAVQFVGEHVK<br>AHIHPGFALTAVR<br>MLFHVQVPR<br>GLIHSFLQTLR<br>QGLPDFISR<br>MLATLFLNLR<br>QPLNPANEAR<br>QDFVVTDFYK<br>LGAMDADEPLFVDDYR<br>LRPPPDYEETLR<br>YVTEFPHYHR |
|                                     | UL83  | UL83, tegument protein pp65                | 52139256 | 62.91  | 20                | 49.6                  | 17.3                                          | LLQTGIHVR<br>LTVSGLAWTR<br>YQEFFWDANDIYR<br>GDTPLPHETR<br>YQEFFWDANDIYR<br>EPDYYTSAFVFTK<br>IFAELEGWQPAAPK<br>VLRPPSTFEQDHSR<br>DNVPLQEIQLR                          |
|                                     | UL48  | UL48; tegument protein                     | 44903274 | 253.52 | 24                | 9.5                   | -                                             | LHLPDVVLGNTN<br>ELVTEAVVWGNAR<br>LSDLGQESAFEKEYSR<br>GTVFEEETVWSLCPPNR                                                                                               |
|                                     | UL45  | UL45, ribonucleotide reductase subunit 1   | 52139230 | 101.7  | 28                | 30.3                  | 19.5                                          | EFLVAVVWGNAR<br>LSDLGQESAFEKEYSR<br>GTVFEEETVWSLCPPNR                                                                                                                |
|                                     | UL47  | UL47, tegument protein U30                 | 1780825  | 109.96 | 20                | 28.8                  | 15.9                                          | EFLVAVVWGNAR<br>LSDLGQESAFEKEYSR<br>GTVFEEETVWSLCPPNR                                                                                                                |
|                                     | UL44  | UL44, DNA polymerase processivity subunit  | 9625729  | 46.23  | 17                | 50                    | 16.5                                          | NGLFAVENFLTEEPFQR<br>IVTEHDTLLYVSR<br>ESENSAVHVDLDFGVADLLK                                                                                                           |
|                                     | UL69  | UL69, multifunctional expression regulator | 9625754  | 82.68  | 17                | 31                    | 23.6                                          | ILLSHDELMTDYLHHR<br>FCLDYEVPVR<br>GRHDAPSLSSLER                                                                                                                      |
|                                     | UL112 | early phosphoprotein p50                   | 2058407  | 44.05  | 11                | 31.1                  | 6.6                                           | ILHGSVNTDFVR<br>TQQGFMSIDITGDGELQELFVR<br>YWTFANPNR                                                                                                                  |
|                                     | TRS1  | TRS1, tegument protein                     | 9625873  | 83.98  | 15                | 21.4                  | 11.9                                          | YTRPTEPPLTQASLGR<br>LLLSQIPVER<br>WDALHLHPR                                                                                                                          |
|                                     | UL80  | UL80, capsid maturation protease           | 52139253 | 73.84  | 18                | 22.8                  | 8.9                                           | DAFFSLLGASR<br>HFADYVDPHYPGWGR<br>SDSYGLLGNVDALYRER<br>DSPGGMDEPPSGWER<br>YDQSPDEAELLPR<br>FPDLTAADRDGLR                                                             |
|                                     | UL46  | UL46, capsid triplex subunit 1             | 9625731  | 33.03  | 16                | 62.5                  | 19.9                                          | DPADEDNELVTALK<br>LDFSVLGDGDFREFV<br>FFVPEGLVEFEAQPGALLIR                                                                                                            |
|                                     | UL104 | UL104                                      | 44903311 | 78.52  | 31                | 52.6                  | 30                                            | LYVAEPLAYER<br>DAAPFRPLAVEDNR<br>LHAALFPYR                                                                                                                           |
|                                     | UL25  | UL25                                       | 9625710  | 73.54  | 24                | 51.3                  | 23.4                                          | FVLQDFDVQHLR<br>SPPPLPRDYDQQR<br>IFSQVPPDEREEDTLR                                                                                                                    |
|                                     | UL97  | phosphotransferase                         | 75707686 | 78.15  | 15                | 24.7                  | 26.9                                          | RPLRPPVLVSLAR<br>AALCDYSLSEPYDYNER<br>VGGVDVLEENDVELR                                                                                                                |
| UL77                                | UL77  | 9625762                                    | 71.19    | 29     | 52.6              | 33.9                  | DVPVFVHEQQYLR<br>LSGQVRDDVLSLWSR<br>HYHPGTFDR |                                                                                                                                                                      |

|                               |          |                                                                                           |          |        |    |      |      |                                                                                                                                                                                  |
|-------------------------------|----------|-------------------------------------------------------------------------------------------|----------|--------|----|------|------|----------------------------------------------------------------------------------------------------------------------------------------------------------------------------------|
|                               | UL93     | UL93                                                                                      | 9625779  | 68.46  | 30 | 55   | 32.1 | DPPDSVATVLGELPQLLPR<br>LPVAVFFEPHEENVLR<br>VLWYVNSFWR<br>MFYAVFTTLGLRCPDNR<br>DRFQNFVAVLAR<br>DLLREEMEANK<br>SRELSYDDHEVELYR<br>GDEEFIYHAGPLEPPSK<br>ELSYDDHEVELYR<br>LREWVDVQHR |
|                               | US22     | US22                                                                                      | 28373241 | 65.03  | 19 | 34.8 | 16.4 | TEVEPLLMLGSIEGLR<br>SQLESALDWFLRPR<br>HPQTPFATTEPR                                                                                                                               |
|                               | UL84     | UL84                                                                                      | 9625770  | 65.43  | 12 | 22.3 | 5.4  | SWLELTVLSDENGATFPR<br>RPFSDAPLPYFVPPR                                                                                                                                            |
|                               | UL85     | UL85                                                                                      | 9625771  | 34.59  | 18 | 74.3 | 21   | TPARQHVSPDDEIAR<br>LVAAVVPIQR<br>KLALEDSSMLLVK<br>GDALCVLPLPHGFLAR                                                                                                               |
|                               | UL80.5   | UL80.5                                                                                    | 52139254 | 38.25  | 12 | 40.4 | 3    | DSPGGMDEPPSGWER<br>DAFFSLLGASR<br>HFADYVDPHYGWGR                                                                                                                                 |
|                               | UL122    |                                                                                           | 44903319 | 44.85  | 12 | 28.6 | -    | NLPFTIPSMHQVLDEAIK<br>ELHTHQLCPR                                                                                                                                                 |
|                               | UL27     | UL27                                                                                      | 44903258 | 69.09  | 12 | 15.6 | -    | TPEDLVAAGGQKK<br>IALAVATGQYVCTLLDYK                                                                                                                                              |
|                               | UL26     | UL26                                                                                      | 44903257 | 24.87  | 9  | 58.2 | -    | GYTLFVCDVEILTTPR<br>HLDLPYPR<br>GLLHSYFEDVER                                                                                                                                     |
|                               | UL82     | tegument protein pp71                                                                     | 52139255 | 62.01  | 8  | 12.2 | 3.5  | RLPDNGFQLLIPK<br>VPVSGHLFQSQR                                                                                                                                                    |
| <b>Host</b><br>(Homo sapiens) | CHC      | Ciathrin heavy chain 1                                                                    | 4758012  | 192.69 | 70 | 48.5 | 60.6 | TSIDAYDNFDNISLAQR<br>ALEHFTDLYDIKR<br>VGYPDWIFLLR<br>NNLAGAEELFAR<br>IVLDSNVFSEHR<br>NLQNLLILTAIK<br>MREHLELFSWR<br>ESYVETELIFFALAK<br>KDPELWGSVLLSNPYR<br>AHMGMFTELAIFYSK       |
|                               | DBX      | Dead box, X isoform                                                                       | 2580550  | 73.27  | 24 | 39.4 | 10.7 | DREEALHQFR<br>DFLDEYIFLAVGR<br>HVINFDLPSDIEEYVHR                                                                                                                                 |
|                               | HSP70    | Heat shock 70 kDa protein 8 isoform 1 variant                                             | 62897129 | 70.9   | 22 | 39.6 | 9.5  | STAGDTHLGGEDFNR<br>TVTNAVVTVPAYFNDSQR<br>ARFEELNADLFR                                                                                                                            |
|                               | TUBB     | tubulin beta polypeptide                                                                  | 57209813 | 47.77  | 17 | 42.9 | 14.5 | NSSYFVWIPNMVK<br>ISEQFTAMFR                                                                                                                                                      |
|                               | Tuba1b   | tubulin, alpha 2                                                                          | 34740335 | 50.15  | 16 | 46   | 9.7  | AVFVDLEPTVIDEVR<br>IHFPLATYAPVISAER                                                                                                                                              |
|                               | HNRNPH1  | HNRNPH1                                                                                   | 48145673 | 49.13  | 11 | 38   | 3.9  | STGEAFVQFASQEIAR<br>HTGPNSPDTANDGFVR<br>SNNVEMDWVLK                                                                                                                              |
|                               | DDOST    | oligosaccharyltransferase                                                                 | 2662375  | 50.73  | 7  | 16.2 | -    | SSLNPILFR<br>TLVLLDNLNVR                                                                                                                                                         |
|                               | 14-3-3 ε | tyrosine 3/tryptophan 5 -monooxygenase activation protein, epsilon polypeptide            | 5803225  | 29.17  | 13 | 66.4 | 11   | YLAEFATGNDRK<br>VAGMDVELTVEER<br>LAEQAERYDEMVESMK                                                                                                                                |
|                               | 14-3-3 γ | Tyrosine 3-monooxygenase/tryptophan 5-monooxygenase activation protein, gamma polypeptide | 14198143 | 28.17  | 15 | 76.1 | 9.9  | LAEQAERYDDMAAAMK<br>NVTLENEPLSNEER<br>TAFDDAIAELDTLNEYSYK                                                                                                                        |
|                               | 14-3-3 ζ | Tyrosine 3-monooxygenase/tryptophan 5-monooxygenase activation protein, zeta polypeptide  | 68085578 | 27.71  | 11 | 50.8 | 3.2  | FLIPNASQAEISK<br>GIVDQSQAYQEAFEISK<br>GLALNFSVFYIEILNSPEK                                                                                                                        |
| <b>Likely contaminants</b>    | VIM      | Vimentin                                                                                  | 37852    | 53.69  | 38 | 80.5 | 39.4 | ILLAELEQLKGGQK<br>KVESLQEEIAFLK                                                                                                                                                  |
|                               | SSA1     | SSA1                                                                                      | 14994115 | 54.27  | 28 | 50.2 | 28.5 | LQVALGELR<br>NFLVEEQR                                                                                                                                                            |
|                               | ACTB     | actin, beta                                                                               | 14250401 | 41.01  | 19 | 63.4 | 20.2 | LDLAGRDLTYLMK<br>VAPEEHVLLTEAPLNPK                                                                                                                                               |
